# Supplementary material for: Insights into the SARS-CoV-2-Mediated Alteration in the Stress Granule Protein Regulatory Networks in Humans
Source: MDPI journal article supplement (doi:10.3390/pathogens10111459), 2021-11-11
Supplement: s1 [file s1]

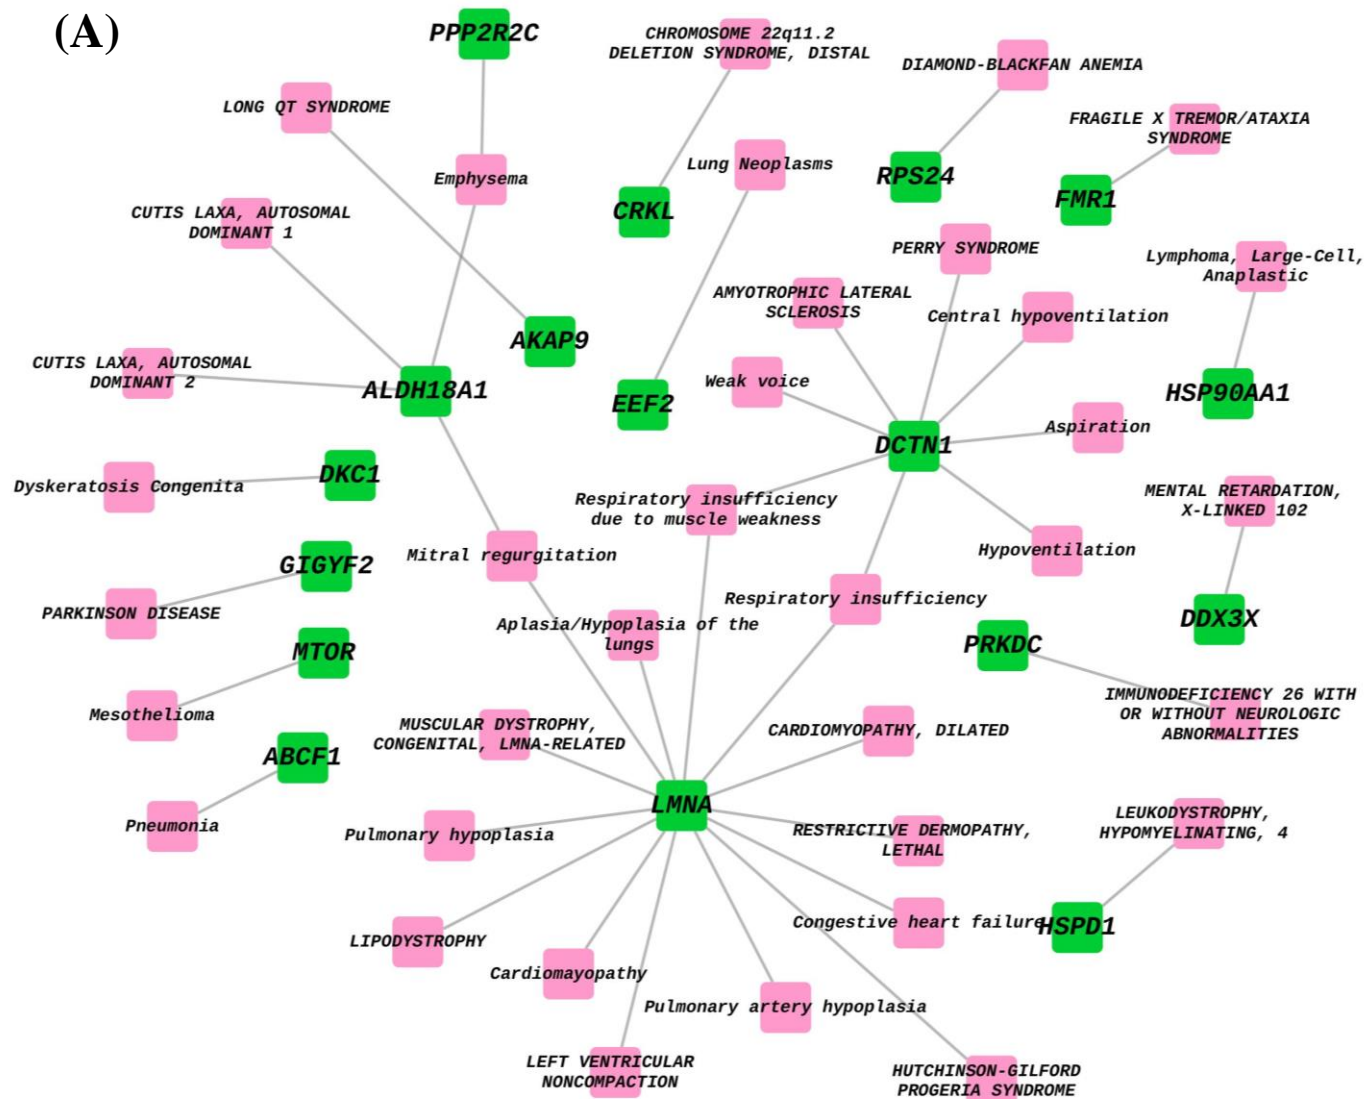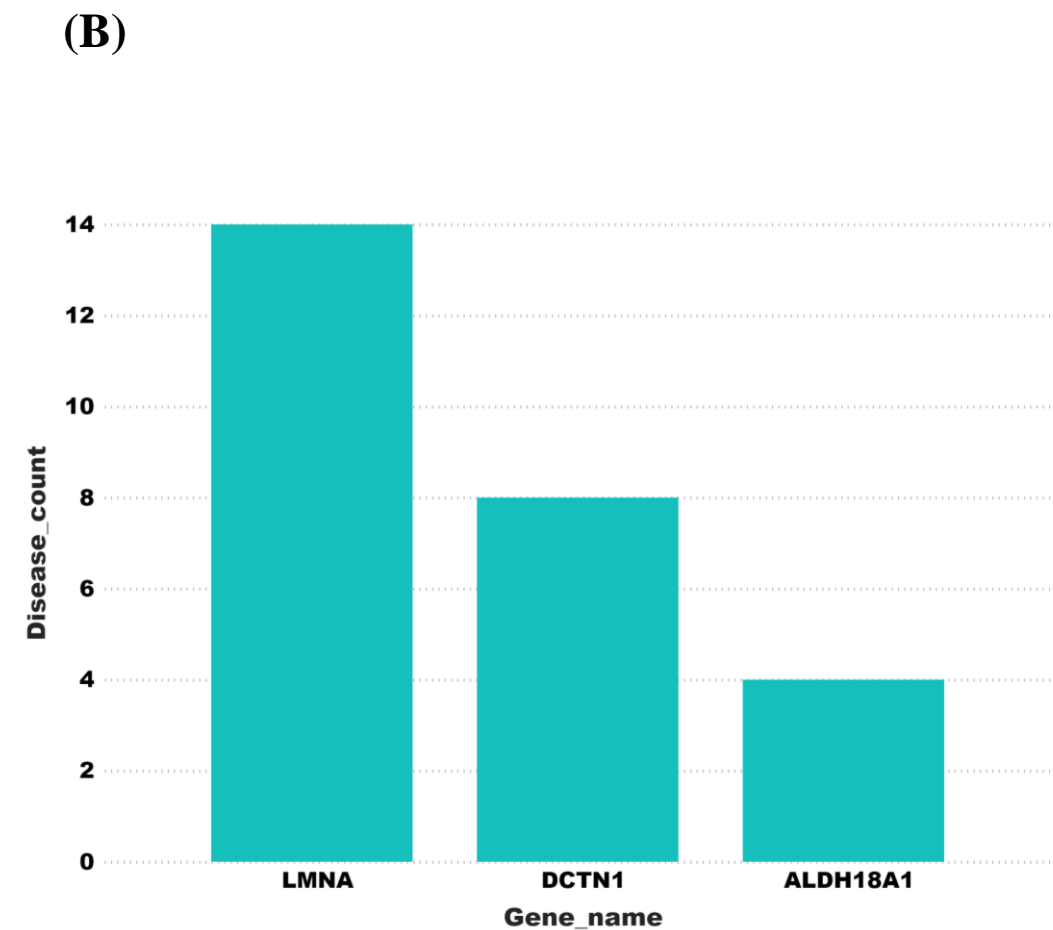

**Supplementary Figure 1.** SG gene-disease interaction network. (A) Interaction of SG genes and the associated lung/respiratory affecting diseases. SARS-CoV-2 target SG genes are shown in green, lung/respiratory-related affecting diseases are represented in pink. (B) Bar plot of key SG genes having maximum connections to various lung/respiratory affecting diseases in the network.

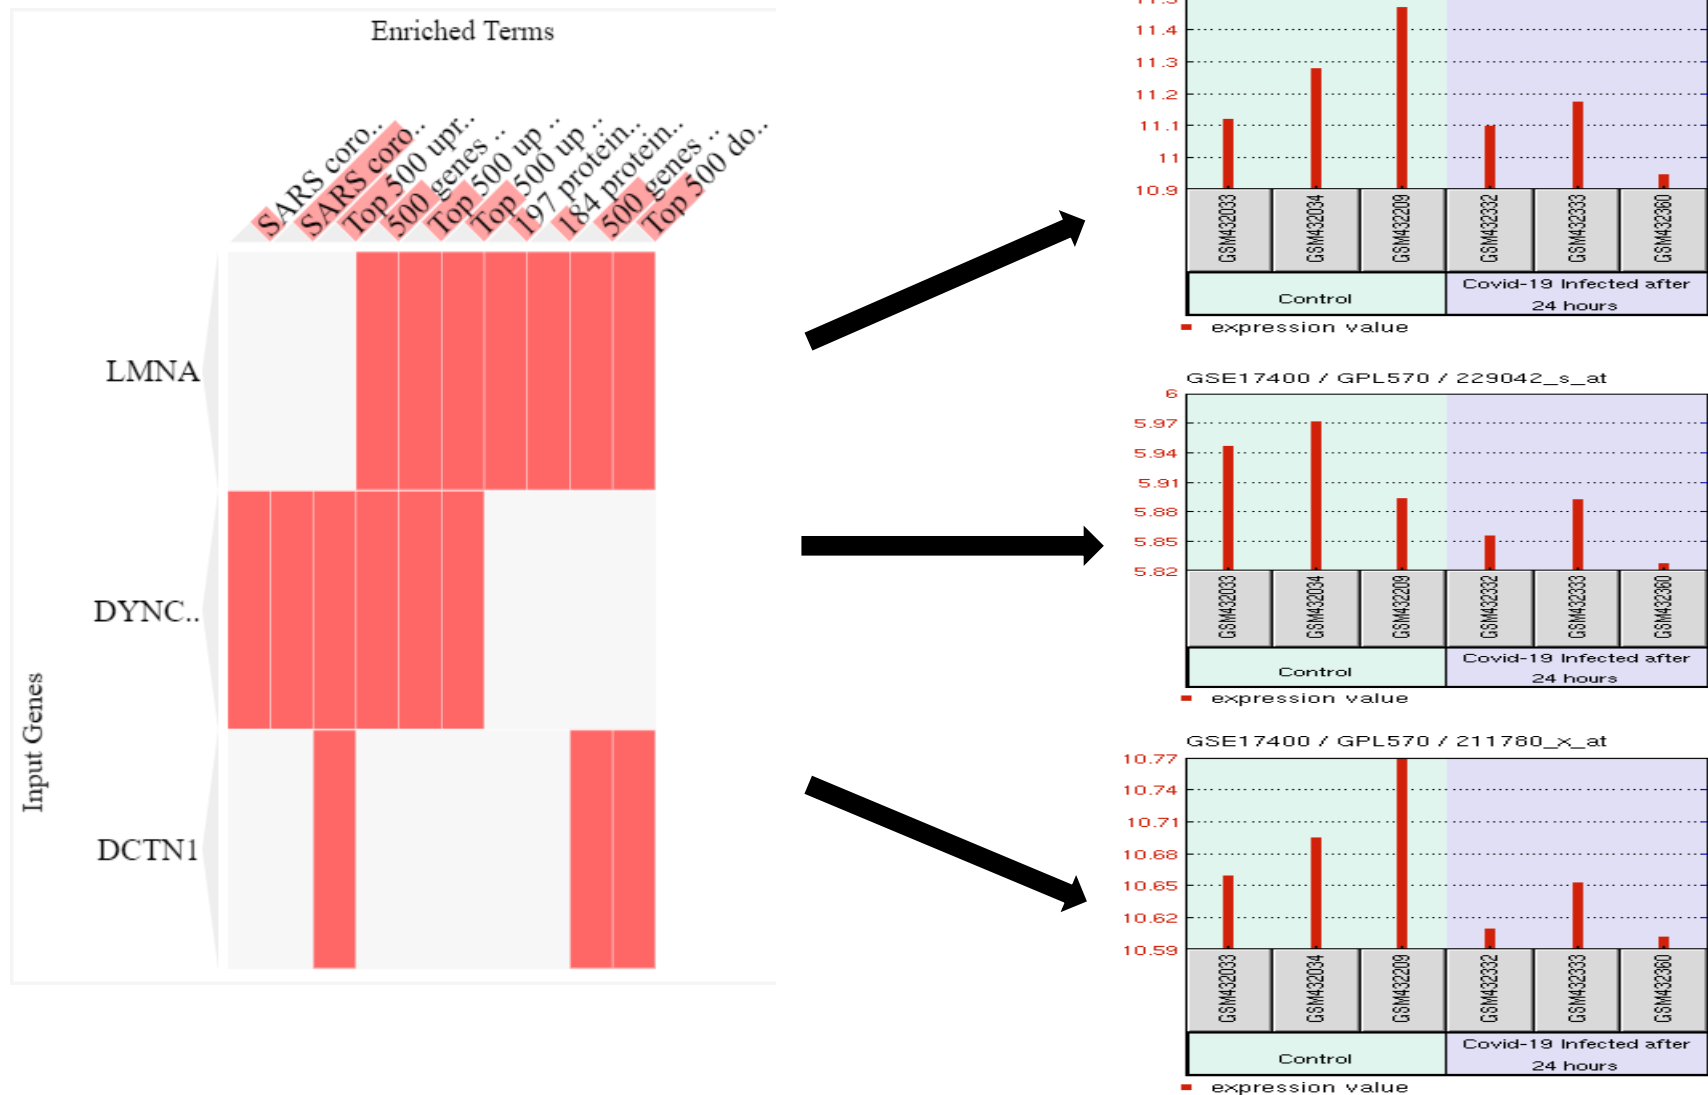

**Supplementary Figure 2.** Effects of SARS-CoV-2 challenges on the expression of LMNA, DYNC1H1, and DCTN1 genes. (A) GSEA of the COVID-19 related gene sets revealed mostly downregulation of the key SG genes. GEO profiles of the LMNA, DYNC1H1, and DCTN1 genes expression in human bronchial epithelial cell in COVID-19 condition after 24hr of infection (GSE17400).

**(A)**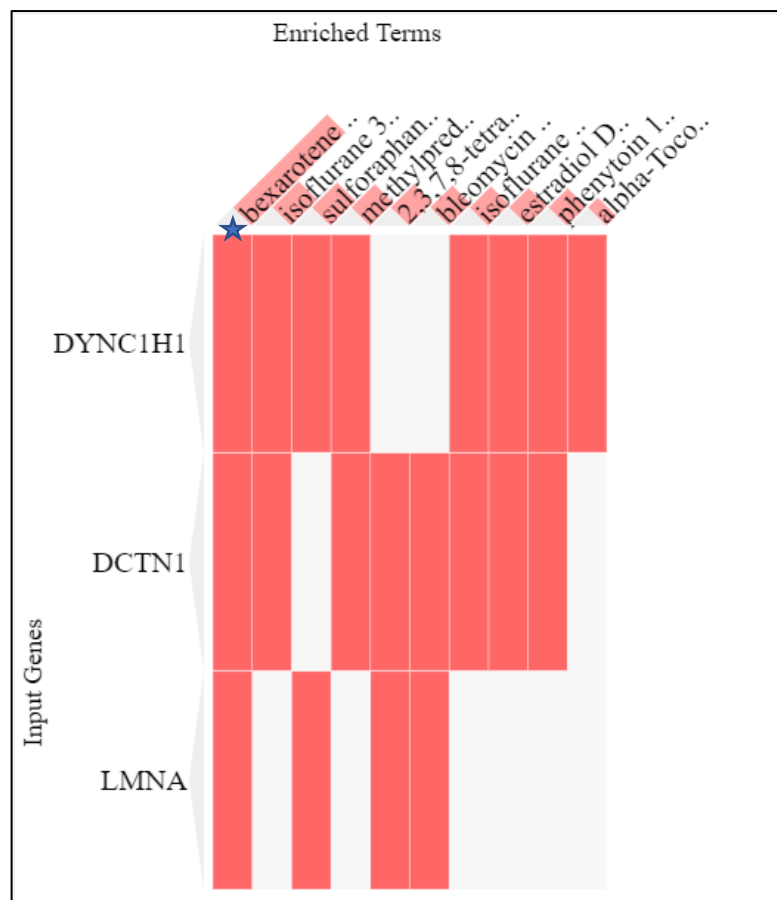**(B)**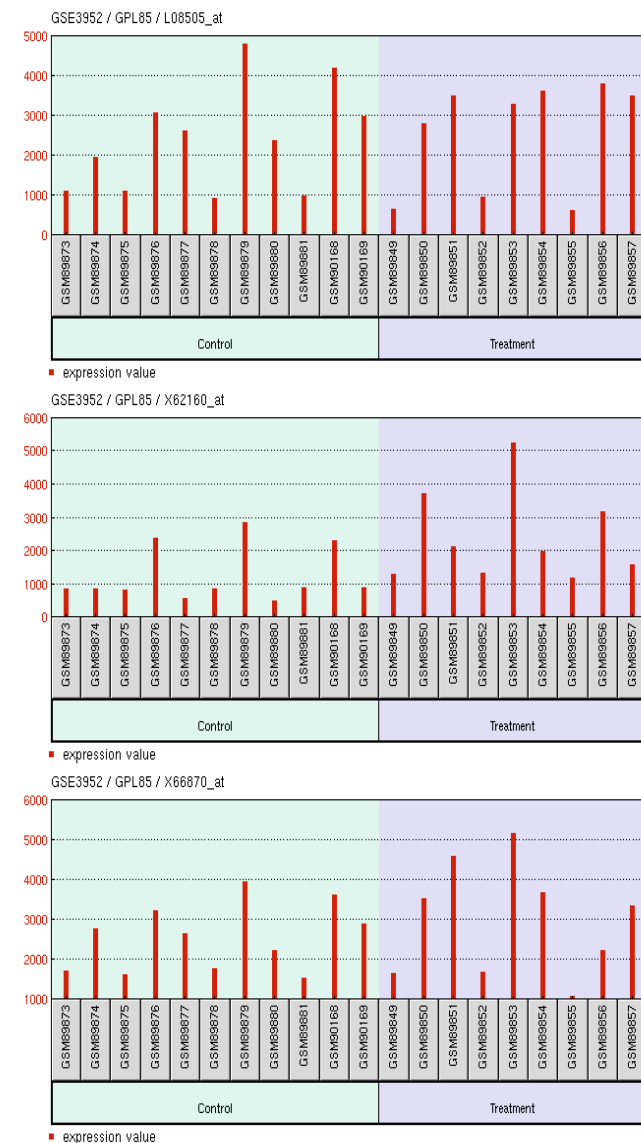

**Supplementary Figure 3.** (A) GSEA of the drug perturbations from GEO database records of downregulated genes identify bexarotene as potential drug candidate against SARS CoV 2 infection. (B) Bexarotene increasing the expression of LMNA, DYNC1H1, and DCTN1 genes as shown by enriched GEO records (GSE3952).
